# Supplementary material for: A closer look into NADPH oxidase inhibitors: Validation and insight into their mechanism of action
Source: PubMed Central journal article supplement — Redox Biol. 2020 Feb 15;32:101466. doi: 10.1016/j.redox.2020.101466 (PMC7042484; doi:10.1016/j.redox.2020.101466), 2020-02-15
Supplement: mmc2.pdf [file mmc2.pdf]

## SUPPLEMENTARY FIGURES

### **A closer look into NADPH oxidase inhibitors: validation and insight into their mechanism of action**

Joana Reis<sup>1</sup>, Marta Massari<sup>1</sup>, Sara Marchese<sup>1</sup>, Marta Ceccon<sup>1</sup>, Friso S. Aalbers<sup>1</sup>,  
Federica Corana<sup>2</sup>, Sergio Valente<sup>3</sup>, Antonello Mai<sup>3</sup>,  
Francesca Magnani<sup>1</sup>, Andrea Mattevi<sup>1\*</sup>

<sup>1</sup>Department of Biology and Biotechnology “Lazzaro Spallanzani”, University of Pavia,  
via Ferrata 9, 27100 Pavia, Italy

<sup>2</sup>Centro Grandi Strumenti, University of Pavia, via Bassi 21, 27100 Pavia, Italy

<sup>3</sup>Department of Drug Chemistry and Technologies, Sapienza University of Rome, P. le A.  
Moro 5, 00185 Rome, Italy.

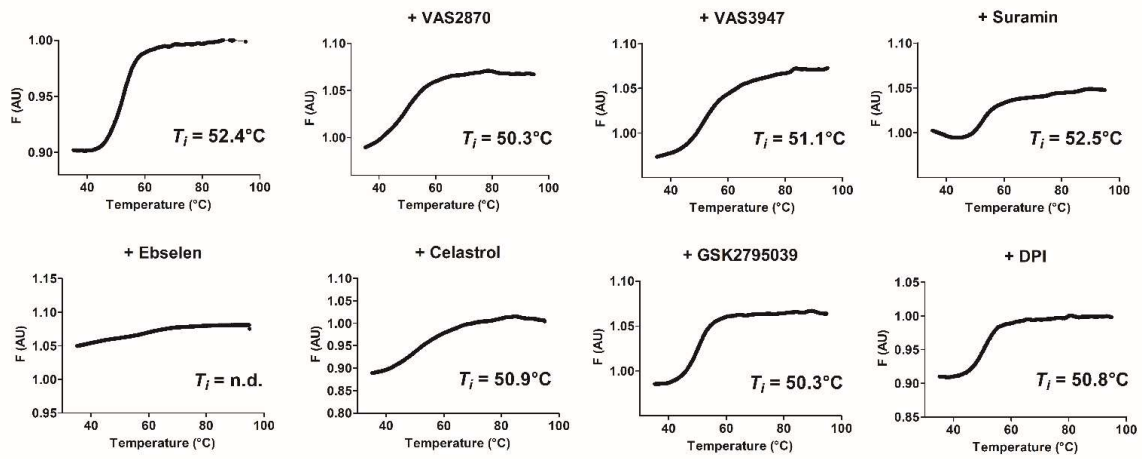

**Supplementary Figure 1.** Thermal shift assays of NOX inhibitors on wild-type NOX5 dehydrogenase domain. Protein unfolding was monitored following the intrinsic protein fluorescence. The profile curves and corresponding inflection temperatures ( $T_i$ ) are depicted.

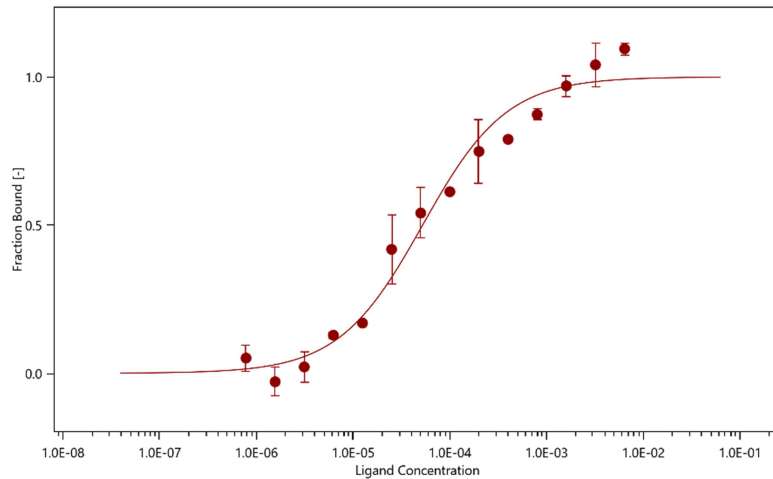

**Supplementary Figure 2.**  $K_d$  determination of suramin binding to the wild-type dehydrogenase domain of NOX5 domain using microscale thermophoresis.

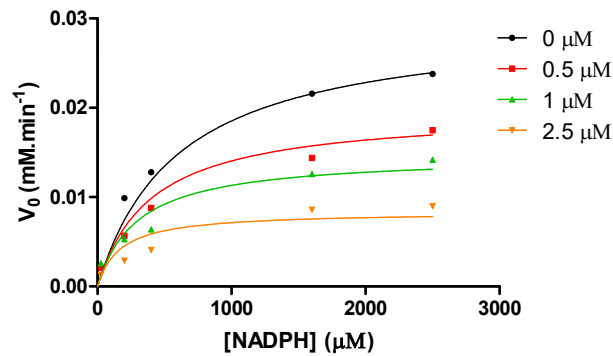

**Supplementary Figure 3.**  $K_i$  determination for DPI against the full-length bacterial NOX5.

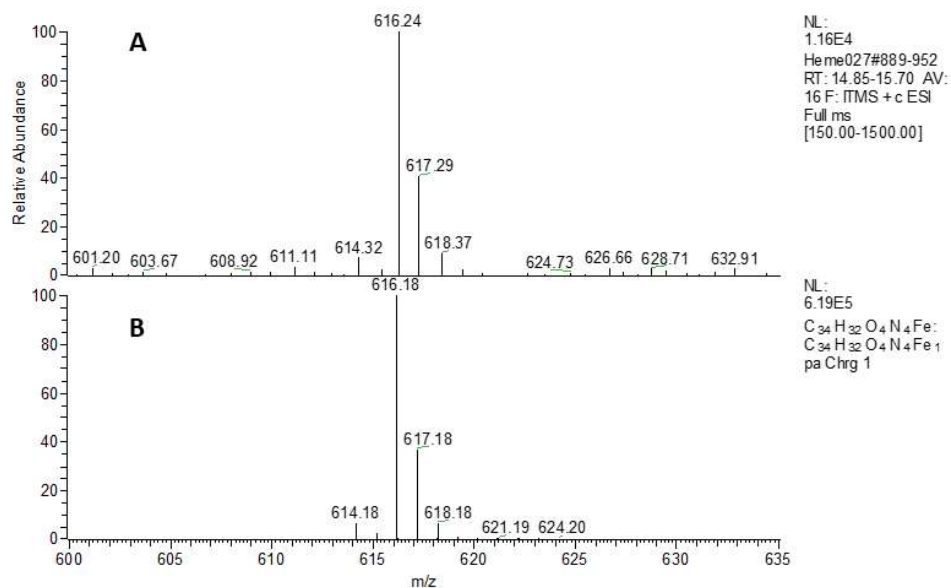

**Supplementary Figure 4.** ESI-MS spectra of the heme extracted from the reduced transmembrane domain incubated with DPI. (A) Experimental and (B) theoretical isotopic pattern.

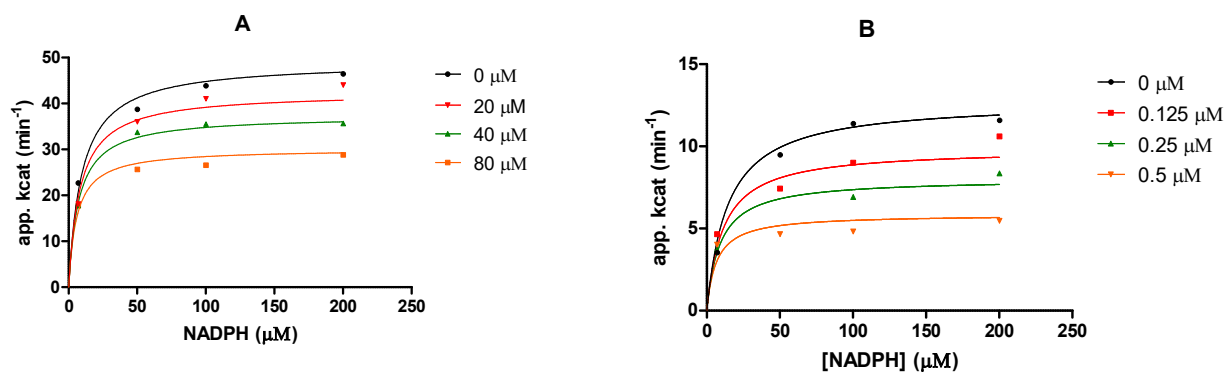

**Supplementary Figure 5.**  $K_i$  determination of DPI on (A) wild-type and (B) mutant dehydrogenase domain of bacterial NOX5.

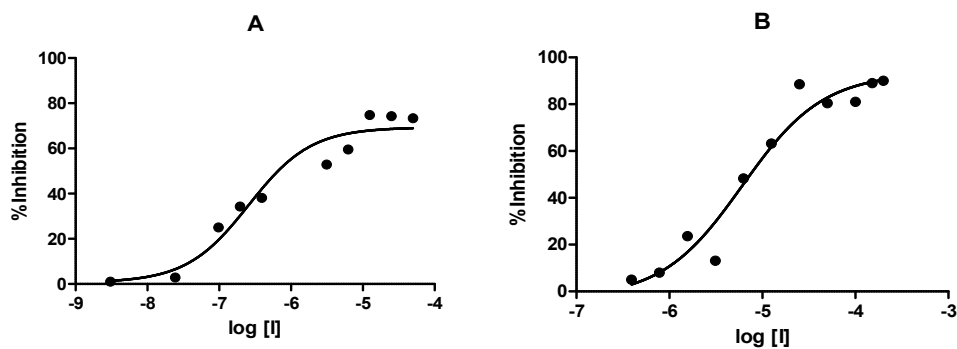

**Supplementary Figure 6.**  $IC_{50}$  determination for VAS2870 (A) and VAS3947 (B) against the wild-type dehydrogenase domain of bacterial NOX5.

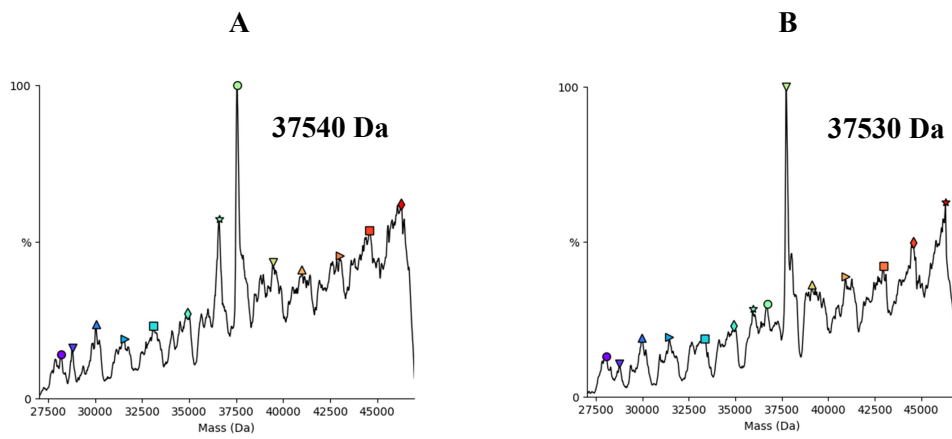

**Supplementary Figure 7.** ESI-MS spectra for mutant C688S dehydrogenase (**A**) without and (**B**) with addition of VAS2870.
